# Supplementary material for: Developmental and light regulation of tumor suppressor protein PP2A in the retina
Source: PubMed Central journal article supplement (PMC5788578; doi:10.18632/oncotarget.23351), 2017-12-17
Supplement: oncotarget-09-1505-s001.pdf [file oncotarget-09-1505-s001.pdf]

## Developmental and light regulation of tumor suppressor protein PP2A in the retina

### SUPPLEMENTARY MATERIAL

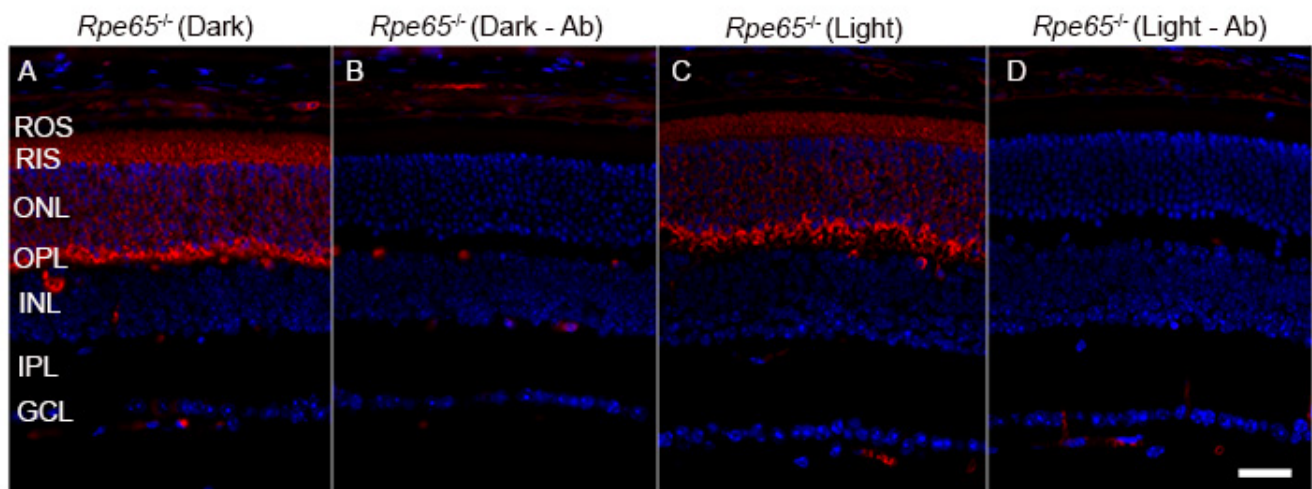

**Supplementary Figure 1: Localization of rod arrestin in dark- and light-adapted *Rpe65*<sup>-/-</sup> mice.** Prefer-fixed sections of dark- (A, B) and light-adapted (C, D) *Rpe65*<sup>-/-</sup> mouse retinas were stained for rod arrestin (A, C) and DAPI (A-D). Panels B and D represent the omission of primary antibody. ROS, rod outer segments; RIS, rod inner segments; ONL, outer nuclear layer; OPL, outer plexiform layer; INL, inner nuclear layer; IPL, inner plexiform layer; GCL, ganglion cell layer. Scale bar = 50  $\mu$ m.
